# Supplementary material for: Associations of comprehensive oral health with body composition, physical performance, and sarcopenia among middle-aged and older adults in rural western China: Potential causal mediating mechanisms
Source: Research Square preprint supplement (doi:10.21203/rs.3.rs-7855492/v1), 2026-01-28
Supplement: Supplementary file 1 [file 4333eb6d34cf111743744d4a.xlsx]

## Sheet: eTable 1
Supplemental Table 1 Associations between oral health markers and body composition among individuals aged 44-90 in rural areas of western China
Body composition indicators	Dentures				Difficulty eating hard foods				Choking				Dry mouth symptoms				Frequencies of brushing teeth ≤ 2 times/day				Reduced outdoor activities				Not able to eat hard foods				Not able to visit dentist within 1 year					Q2 for number of natural teeth missing				Q3 for number of natural teeth missing
	Adjusted beta	Low limit of 95% CI	High limit of 95% CI	P value	Adjusted beta	Low limit of 95% CI	High limit of 95% CI	P value	Adjusted beta	Low limit of 95% CI	High limit of 95% CI	P value	Adjusted beta	Low limit of 95% CI	High limit of 95% CI	P value	Adjusted beta	Low limit of 95% CI	High limit of 95% CI	P value	Adjusted beta	Low limit of 95% CI	High limit of 95% CI	P value	Adjusted beta	Low limit of 95% CI	High limit of 95% CI	P value	Adjusted beta	Low limit of 95% CI	High limit of 95% CI	P value	Q1	Adjusted beta	Low limit of 95% CI	High limit of 95% CI	P value	Adjusted beta	Low limit of 95% CI	High limit of 95% CI	P value	P values for categorized number of natural teeth missing
BMI	-1.26	-2.11	-0.42	0.003	-0.24	-1.18	0.70	0.618	-0.09	-1.37	1.19	0.893	0.71	-0.16	1.58	0.110	0.80	-0.36	1.96	0.177	0.21	-0.67	1.08	0.640	0.22	-0.68	1.12	0.628	0.20	-1.37	1.76	0.804	Reference	-0.68	-1.74	0.39	0.213	-1.25	-2.43	-0.07	0.039	0.038
Waist-hip ratio	0.005	-0.02	0.03	0.680	-0.02	-0.05	0.002	0.068	-0.02	-0.06	0.01	0.233	0.002	-0.02	0.03	0.882	0.003	-0.03	0.03	0.847	-0.01	-0.03	0.01	0.473	-0.0001	-0.02	0.02	0.993	0.004	-0.04	0.05	0.868	Reference	0.003	-0.03	0.03	0.815	-0.003	-0.03	0.03	0.874	0.877
SMI(Appendicular Skeletal Muscle Mass Index)	-0.02	-0.19	0.14	0.774	-0.17	-0.35	0.01	0.058	-0.07	-0.32	0.18	0.572	0.01	-0.16	0.18	0.905	-0.03	-0.25	0.20	0.828	-0.07	-0.24	0.10	0.411	-0.11	-0.29	0.06	0.209	0.04	-0.26	0.34	0.798	Reference	-0.05	-0.25	0.15	0.638	-0.05	-0.27	0.17	0.640	0.638
Muscle mass/ Kg	-0.32	-1.56	0.93	0.621	-0.74	-2.11	0.62	0.284	-0.33	-2.20	1.53	0.727	-0.39	-1.65	0.87	0.548	0.13	-1.56	1.82	0.882	-0.21	-1.48	1.06	0.749	-0.69	-2.01	0.64	0.309	-0.70	-2.98	1.57	0.545	Reference	-0.34	-1.90	1.21	0.665	-0.86	-2.59	0.87	0.329	0.328
Skeletal muscle mass/ Kg	-0.19	-0.99	0.60	0.634	-0.48	-1.35	0.39	0.277	-0.13	-1.32	1.06	0.830	-0.25	-1.06	0.55	0.535	0.12	-0.95	1.20	0.822	-0.15	-0.96	0.66	0.717	-0.41	-1.26	0.43	0.336	-0.45	-1.90	0.99	0.539	Reference	-0.18	-1.17	0.81	0.726	-0.55	-1.65	0.55	0.329	0.329
Left arm muscle mass/ Kg	-0.06	-0.16	0.04	0.239	-0.05	-0.15	0.06	0.396	-0.04	-0.18	0.11	0.633	0.03	-0.07	0.13	0.556	0.07	-0.06	0.21	0.276	-0.02	-0.12	0.08	0.749	-0.04	-0.15	0.06	0.441	-0.02	-0.20	0.16	0.802	Reference	-0.05	-0.17	0.08	0.466	-0.08	-0.22	0.05	0.228	0.227
Right arm muscle mass/ Kg	-0.05	-0.15	0.05	0.363	-0.05	-0.15	0.06	0.414	-0.05	-0.20	0.09	0.481	0.00	-0.10	0.11	0.923	0.07	-0.07	0.20	0.328	-0.02	-0.12	0.08	0.703	-0.03	-0.13	0.08	0.597	-0.03	-0.21	0.15	0.740	Reference	-0.06	-0.19	0.06	0.318	-0.09	-0.23	0.05	0.212	0.210
Left leg muscle mass (Kg)/mean (SD)	0.07	-0.17	0.31	0.584	-0.25	-0.51	0.01	0.056	-0.13	-0.48	0.23	0.490	-0.07	-0.31	0.17	0.565	-0.20	-0.53	0.12	0.218	-0.12	-0.37	0.12	0.315	-0.20	-0.46	0.05	0.114	-0.08	-0.52	0.36	0.719	Reference	0.02	-0.28	0.31	0.911	0.04	-0.29	0.36	0.831	0.831
Right leg muscle mass (Kg)/mean (SD)	0.04	-0.19	0.28	0.708	-0.23	-0.49	0.02	0.068	-0.15	-0.50	0.19	0.379	-0.05	-0.29	0.18	0.649	-0.07	-0.38	0.25	0.682	-0.07	-0.31	0.16	0.550	-0.22	-0.47	0.02	0.077	-0.10	-0.52	0.32	0.642	Reference	-0.01	-0.29	0.28	0.971	-0.03	-0.34	0.29	0.871	0.871
Trunk muscle mass/ Kg	-0.32	-0.92	0.28	0.301	-0.41	-1.07	0.25	0.220	-0.26	-1.16	0.64	0.572	0.11	-0.49	0.72	0.715	0.35	-0.47	1.16	0.402	-0.12	-0.74	0.49	0.695	-0.24	-0.88	0.40	0.458	-0.32	-1.42	0.78	0.568	Reference	-0.28	-1.02	0.47	0.468	-0.56	-1.39	0.27	0.189	0.188
Fat free mass/ Kg	-0.35	-1.69	1.00	0.614	-0.81	-2.28	0.66	0.283	-0.41	-2.42	1.61	0.692	-0.42	-1.78	0.94	0.544	0.11	-1.71	1.94	0.902	-0.22	-1.59	1.15	0.753	-0.74	-2.17	0.68	0.307	-0.76	-3.21	1.70	0.545	Reference	-0.39	-2.07	1.30	0.651	-0.93	-2.80	0.94	0.328	0.328
Fat mass/ Kg	-2.15	-3.77	-0.52	0.010	-0.44	-2.24	1.37	0.636	-0.87	-3.34	1.59	0.488	1.65	-0.02	3.32	0.052	1.30	-0.93	3.53	0.254	0.47	-1.20	2.15	0.579	0.40	-1.34	2.14	0.655	0.28	-2.73	3.29	0.857	Reference	-1.06	-3.11	1.00	0.313	-1.89	-4.17	0.39	0.105	0.104
Visceral fat area/ cm2	-4.65	-10.85	1.56	0.142	-4.87	-11.65	1.91	0.159	-4.98	-14.28	4.32	0.294	4.25	-2.06	10.57	0.187	4.04	-4.40	12.48	0.348	-0.57	-6.90	5.77	0.861	0.72	-5.85	7.29	0.831	-0.07	-11.42	11.29	0.991	Reference	-2.20	-10.00	5.60	0.580	-4.81	-13.47	3.85	0.277	0.276
Protein/Kg	-0.07	-0.34	0.19	0.588	-0.16	-0.45	0.13	0.287	-0.03	-0.43	0.36	0.879	-0.07	-0.33	0.20	0.619	0.04	-0.32	0.40	0.815	-0.05	-0.32	0.21	0.689	-0.15	-0.43	0.13	0.304	-0.17	-0.66	0.31	0.480	Reference	-0.06	-0.39	0.27	0.707	-0.19	-0.56	0.18	0.308	0.307
Minerals/ Kg	-0.03	-0.13	0.08	0.591	-0.06	-0.17	0.06	0.316	-0.07	-0.23	0.09	0.381	-0.03	-0.13	0.08	0.617	-0.01	-0.15	0.13	0.892	-0.01	-0.12	0.10	0.841	-0.06	-0.17	0.05	0.306	-0.05	-0.24	0.14	0.623	Reference	-0.04	-0.18	0.09	0.528	-0.07	-0.21	0.08	0.380	0.379
BMR/Kcal	-7.49	-36.60	21.62	0.614	-17.41	-49.17	14.35	0.283	-8.78	-52.25	34.68	0.692	-9.09	-38.46	20.28	0.544	2.48	-37.00	41.96	0.902	-4.75	-34.38	24.88	0.753	-16.07	-46.92	14.78	0.307	-16.37	-69.40	36.66	0.545	Reference	-8.38	-44.76	28.00	0.652	-20.15	-60.54	20.25	0.328	0.328

## Sheet: eTable 2
Supplemental Table 1 Associations between oral health markers and physical performance and sarcopenia among individuals aged 44-90 in rural areas of western China
Physical performance and sarcopenia	Dentures				Difficulty eating hard foods				Choking				Dry mouth symptoms				Frequencies of brushing teeth ≤ 2 times/day				Reduced outdoor activities				Not able to eat hard foods				Not able to visit dentist within 1 year					Q2 for number of natural teeth missing				Q3 for number of natural teeth missing
	Adjusted beta	Low limit of 95% CI	High limit of 95% CI	P value	Adjusted beta	Low limit of 95% CI	High limit of 95% CI	P value	Adjusted beta	Low limit of 95% CI	High limit of 95% CI	P value	Adjusted beta	Low limit of 95% CI	High limit of 95% CI	P value	Adjusted beta	Low limit of 95% CI	High limit of 95% CI	P value	Adjusted beta	Low limit of 95% CI	High limit of 95% CI	P value	Adjusted beta	Low limit of 95% CI	High limit of 95% CI	P value	Adjusted beta	Low limit of 95% CI	High limit of 95% CI	P value	Q1	Adjusted beta	Low limit of 95% CI	High limit of 95% CI	P value	Adjusted beta	Low limit of 95% CI	High limit of 95% CI	P value	P values for categorized number of natural teeth missing
Grip strength/ Kg	0.73	-1.03	2.49	0.415	-1.90	-3.79	-0.01	0.048	-1.92	-4.48	0.64	0.141	-1.22	-2.97	0.53	0.172	-0.82	-3.15	1.51	0.490	-1.33	-3.10	0.43	0.139	-2.82	-4.66	-0.98	0.003	1.18	-2.04	4.39	0.474	Reference	-1.74	-3.93	0.45	0.120	0.15	-2.29	2.58	0.906	0.929
Walk speed	-0.45	-0.82	-0.07	0.019	0.07	-0.34	0.49	0.727	0.40	-0.17	0.98	0.169	0.11	-0.24	0.47	0.536	0.09	-0.43	0.60	0.747	0.47	0.10	0.85	0.014	0.58	0.18	0.99	0.005	0.15	-0.53	0.83	0.657	Reference	0.11	-0.36	0.59	0.641	-0.17	-0.70	0.36	0.533	0.542
<1.0 m/s (Preserved gait speed)	0.49	0.26	0.93	0.028	1.26	0.67	2.36	0.476	3.00	1.26	7.12	0.013	2.07	1.01	4.23	0.047	1.37	0.56	3.34	0.486	0.98	0.49	1.96	0.956	1.85	0.83	4.13	0.131	1.26	0.35	4.49	0.723	Reference	0.66	0.29	1.52	0.329	0.67	0.29	1.58	0.363	0.411
Continous SARC score	-0.75	-1.21	-0.30	0.001	0.58	0.08	1.08	0.022	1.04	0.37	1.71	0.003	0.86	0.41	1.31	0.000	-0.12	-0.74	0.50	0.706	0.57	0.11	1.04	0.015	0.64	0.16	1.13	0.010	-0.17	-1.02	0.68	0.696	Reference	-0.09	-0.66	0.48	0.760	-0.14	-0.77	0.50	0.673	0.671
High risk of SARC, ≥4 points	0.34	0.14	0.81	0.015	2.15	0.94	4.90	0.070	2.61	1.12	6.10	0.026	3.49	1.58	7.70	0.002	0.89	0.34	2.32	0.805	3.98	1.56	10.15	0.004	3.04	1.54	5.99	0.001	0.36	0.11	1.18	0.093	Reference	1.29	0.41	4.10	0.663	0.69	0.22	2.16	0.525	0.44
